# Supplementary material for: Controllable growth of large-size α-GeTe nanosheets with ferroelectricity by substrate pre-annealing
Source: Royal Society of Chemistry journal article supplement (doi:10.1039/d4ce00499j), 2024-01-01
Supplement: d4ce00499j1.pdf [file d4ce00499j1.pdf]

## Supporting Information

### Controllable growth of large-size $\alpha$ -GeTe nanosheets with ferroelectricity by substrate pre-annealing

Zhaxi Suonan<sup>1,2</sup>, Shuo Mi<sup>1,2</sup>, Hanxiang Wu<sup>1,2</sup>, Hua Xu<sup>1,2</sup>, Haoyan Zhang<sup>1,2</sup>, Shanshan Chen<sup>1,2</sup>,  
Zhihai Cheng<sup>1,2</sup>, Fei Pang<sup>1,2</sup>\*

<sup>1</sup>Beijing Key Laboratory of Optoelectronic Functional Materials & Micro-nano Devices, Department of Physics, Renmin University of China, Beijing 100872, China

<sup>2</sup>Key Laboratory of Quantum State Construction and Manipulation (Ministry of Education), Renmin University of China, Beijing, 100872, China

\*Email: feipang@ruc.edu.cn

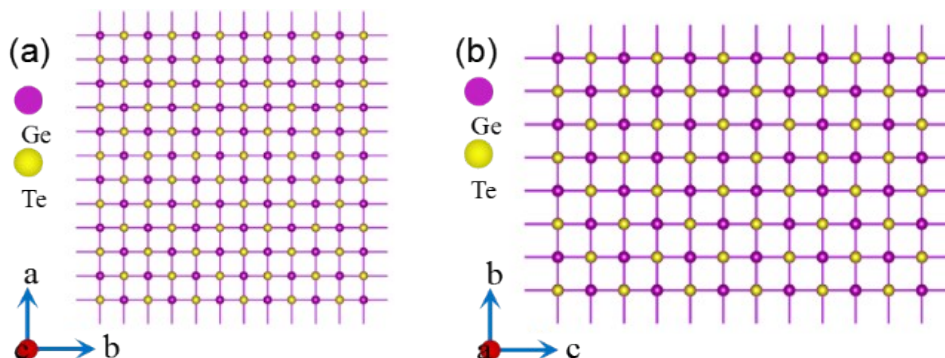

Fig. S1 (a) Top view structure of  $\beta$ -GeTe crystal. (b) Side view structure of  $\beta$ -GeTe crystal.

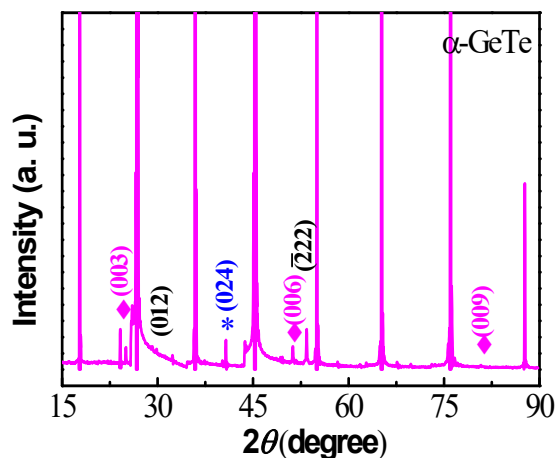

Fig. S2 XRD results of the as-grown  $\alpha$ -GeTe nanosheets on annealed mica substrate.

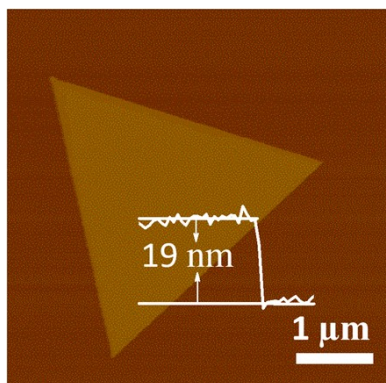

**Fig. S3** Corresponding AFM images of to the Raman signal.

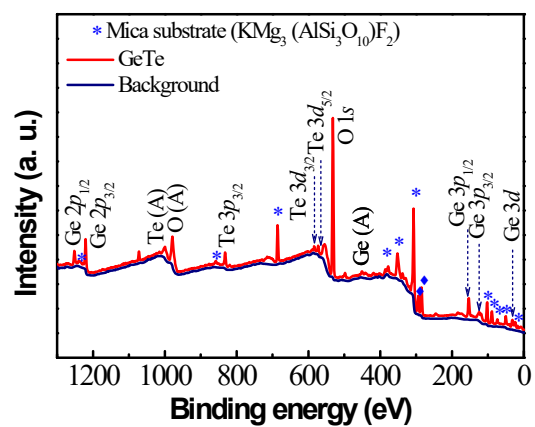

**Fig. S4** Wide-scan survey XPS spectra of  $\alpha$ -GeTe nanosheets.
